# Supplementary material
Source: PubMed Central journal article supplement (PMC1224072)
Supplement: bj3790461add.pdf [file bj3790461add.pdf]

### Supplemental Table 1 Genes with altered expression in MPS VII mice

The Table shows genes for which the expression was altered either up or down 2-fold or more at 2 or 5 months of age in MPS VII mice compared with wild-type mice. ‘♣’ represents a change upwards of 2-fold or more at 2 months; ‘♠’, down 2-fold or more at 2 months; ‘♥’, up 2-fold or more at 5 months; ‘♣’, down 2-fold or more at 5 months. In groups ♣ and ♠, only genes determined to be present ( $P < 0.04$ ) are presented in each category; however, the status of the transcript may be different in other columns (i.e. 2 months MPS VII ERT, 5 months MPS VII and 5 months MPS VII ERT). In groups ♥ and ♣, only genes determined to be present ( $P < 0.04$ ) are presented in each category; however, the status of the transcript may be different in other columns (i.e. 2 months MPS VII, 2 months MPS VII ERT and 5 months MPS VII ERT). Values reported are fold increases (↑) or decreases (↓) in comparison with wild-type mRNA levels. NC, no change in expression levels compared with wild-type; det., mRNA was detected in the experimental group (MPS VII or MPS VII ERT), but undetectable in the wild-type group at that time point; n.d., mRNA was not detected.

| Accession no./gene name | Age (months)... | Mouse        |             |              |             |
|-------------------------|-----------------|--------------|-------------|--------------|-------------|
|                         |                 | MPS VII<br>2 | MPS VII ERT | MPS VII<br>5 | MPS VII ERT |
| ♣:                      |                 |              |             |              |             |
| Metallothionein 1       |                 | ↑3.5         | ↑3.7        | ↑3.2         | ↑3.0        |
| Cyp4a14                 |                 | ↑3.2         | ↑3.0        | NC           | NC          |
| AW122893                |                 | ↑2.6         | ↑2.5        | ↑3.5         | ↑2.8        |
| Metallothionein 2       |                 | ↑2.6         | ↑3.2        | ↑2.5         | ↑2.5        |
| IGFBP2                  |                 | ↑2.5         | ↑2.5        | ↑1.5         | ↑2.1        |
| Gadd45g                 |                 | ↑2.5         | ↑2.0        | ↑2.0         | ↑1.6        |
| Ly6A/E                  |                 | ↑2.3         | NC          | ↑1.6         | NC          |
| Chp-pending(P22)        |                 | ↑2.3         | ↑2.8        | det.         | det.        |
| Mafb                    |                 | ↑2.1         | NC          | det.         | det.        |
| AW212475                |                 | ↑2.0         | ↑1.6        | ↑1.7         | ↑1.6        |
| IGFBP1                  |                 | ↑2.0         | ↓1.9        | ↑1.7         | ↑3.0        |
| ♠:                      |                 |              |             |              |             |
| SAA-2                   |                 | ↓3.5         | ↓7.5        | NC           | ↑1.4        |

|                          |      |      |       |      |
|--------------------------|------|------|-------|------|
| β1-Globin                | ↓3.5 | NC   | NC    | NC   |
| SAA-1                    | ↓3.0 | ↓3.5 | ↓1.9  | NC   |
| AI645694                 | ↓3.0 | ↓1.7 | NC    | NC   |
| Haemoglobin, β-adult     | ↓2.5 | NC   | NC    | NC   |
| AI593759                 | ↓2.5 | ↓2.1 | ↓1.5  | NC   |
| Actin, γ2                | ↓2.3 | NC   | n.d.§ | NC   |
| Malic enzyme             | ↓2.1 | ↓2.3 | NC    | NC   |
| Vanin-1                  | ↓2.1 | NC   | ↓2.5  | NC   |
| Haemoglobin, α-adult     | ↓2.1 | NC   | NC    | NC   |
| AW124226                 | ↓2.0 | NC   | NC    | NC   |
| Mrpl36                   | ↓2.0 | NC   | n.d.  | NC   |
| <hr/>                    |      |      |       |      |
| ♥:                       |      |      |       |      |
| Glutathione peroxidase 3 | n.d. | n.d. | ↑4.6  | n.d. |
| Fdps/Fpps                | ↑1.4 | ↓1.6 | ↑4.6  | ↑2.1 |
| AA716963/IPP isomerase   | ↑1.3 | ↓1.7 | ↑4.3  | ↑3.5 |
| Rgs16                    | ↑1.7 | NC   | ↑4.3  | NC   |
| AW045533/Fdps/Fpps       | NC   | ↓1.7 | ↑4.0  | ↑2.0 |
| AW122893                 | ↑2.6 | ↑2.5 | ↑3.5  | ↑2.8 |
| VCAM 1                   | det. | det. | ↑3.2  | ↑3.2 |
| Metallothionein 1        | ↑3.5 | ↑3.7 | ↑3.2  | ↑3.0 |
| Sap                      | NC   | NC   | ↑3.2  | ↑2.8 |
| AV349152                 | NC   | NC   | ↑3.0  | NC   |
| AI845584/MKP-3/Dusp6 NC  | ↓1.4 | ↑2.8 | ↑2.3  |      |
| Aquaporin 1              | n.d. | n.d. | ↑2.8  | ↑1.9 |
| X61940/MKP-1/Dusp1       | ↑1.4 | NC   | ↑2.8  | ↑1.9 |
| AI848668/Sc4mol          | ↑1.5 | ↓1.5 | ↑2.8  | ↑3.5 |
| Ptp4a1                   | NC   | ↑1.3 | ↑2.6  | ↑3.2 |
| Sc5d                     | NC   | NC   | ↑2.6  | NC   |
| AF077861                 | ↓1.9 | ↑1.7 | ↑2.5  | ↑1.7 |
| AW121568                 | NC   | NC   | ↑2.5  | ↑3.0 |

|                                 |      |      |      |      |
|---------------------------------|------|------|------|------|
| CDC10/Septin7                   | NC   | NC   | ↑2.5 | ↑2.6 |
| Ghr                             | ↑1.7 | NC   | ↑2.5 | NC   |
| ApoA-IV                         | ↓1.9 | ↓1.4 | ↑2.5 | NC   |
| RhoB                            | NC   | NC   | ↑2.5 | NC   |
| Metallothionein 2               | ↑2.6 | ↑3.2 | ↑2.5 | ↑2.5 |
| AI848868                        | NC   | NC   | ↑2.5 | ↑2.8 |
| AI852098                        | NC   | ↓1.2 | ↑2.3 | NC   |
| AI850801                        | NC   | NC   | ↑2.3 | ↑2.3 |
| Rbm3                            | NC   | NC   | ↑2.3 | ↑2.1 |
| AW122933                        | NC   | ↑1.3 | ↑2.3 | ↑2.6 |
| AW046181/Sgk1                   | NC   | ↓2.1 | ↑2.3 | ↑2.5 |
| Cappa2                          | NC   | NC   | ↑2.3 | NC   |
| Y15003/GM <sub>3</sub> synthase | NC   | ↑1.3 | ↑2.3 | ↑1.4 |
| Tieg                            | NC   | ↑2.0 | ↑2.3 | NC   |
| HRS                             | NC   | ↑1.5 | ↑2.3 | ↑2.1 |
| AI747194/Lamp2b                 | NC   | NC   | ↑2.3 | ↑2.3 |
| Hamp                            | ↑1.6 | ↑1.1 | ↑2.3 | ↑2.1 |
| AI848671                        | NC   | NC   | ↑2.1 | ↑2.1 |
| Rnp24-pending                   | ↑1.4 | ↑1.3 | ↑2.1 | NC   |
| Fkbp5                           | NC   | ↑1.7 | ↑2.1 | NC   |
| AA823202                        | NC   | NC   | ↑2.1 | ↑2.0 |
| Angiogenin                      | ↑1.7 | ↑1.5 | ↑2.1 | ↑2.5 |
| AI117157                        | ↑1.5 | NC   | ↑2.1 | NC   |
| Sp3                             | NC   | NC   | ↑2.1 | ↑2.1 |
| Pklr                            | ↓1.4 | NC   | ↑2.1 | NC   |
| H3f3b                           | NC   | ↑1.2 | ↑2.1 | NC   |
| AI853364/D5D                    | NC   | NC   | ↑2.1 | ↑1.7 |
| Lgmn                            | NC   | NC   | ↑2.0 | ↑1.6 |
| AI840643                        | NC   | NC   | ↑2.0 | ↑2.3 |
| AW124932/Hmgcs1                 | NC   | ↓1.9 | ↑2.0 | NC   |

|                 |      |      |      |      |
|-----------------|------|------|------|------|
| AI117848        | NC   | NC   | ↑2.0 | ↑2.8 |
| AI047331        | NC   | NC   | ↑2.0 | ↑2.0 |
| AW106745/Nsdhl  | ↑1.4 | ↓1.2 | ↑2.0 | NC   |
| AB030505        | NC   | ↓1.5 | ↑2.0 | NC   |
| Ddx3            | NC   | NC   | ↑2.0 | ↑2.1 |
| Gadd45g         | ↑2.5 | ↑2.0 | ↑2.0 | ↑1.6 |
| AA619207/ACS4   | NC   | NC   | ↑2.0 | ↑3.5 |
| Cdh2/N-cadherin | NC   | NC   | ↑2.0 | ↑3.2 |
| AW047728        | NC   | ↑1.2 | ↑2.0 | ↑2.1 |
| Bhlhb2          | NC   | NC   | ↑2.0 | ↑1.4 |
| AI845514/ABCA1  | ↓1.2 | NC   | ↑2.0 | ↑2.5 |
| AI645561        | NC   | NC   | ↑2.0 | ↑1.6 |
| Myosin I/Myo1b  | NC   | NC   | ↑2.0 | ↑1.7 |
| Tcf12           | n.d. | NC   | ↑2.0 | ↑2.5 |
| Thra            | NC   | ↑1.6 | ↑2.0 | ↑2.5 |
| Cish2/Socs2     | NC   | ↑2.5 | ↑2.0 | n.d. |
| AL021127/Nsdhl  | NC   | ↓1.5 | ↑2.0 | NC   |
| X16672          | NC   | ↓1.2 | ↑2.0 | ↑2.0 |
| AW209004        | NC   | NC   | ↑2.0 | NC   |
| AW047343        | NC   | NC   | ↑2.0 | ↑2.0 |
| <hr/>           |      |      |      |      |
| ♠:              |      |      |      |      |
| Vanin-1         | ↓2.1 | NC   | ↓2.5 | NC   |
| AV207739        | NC   | NC   | ↓2.3 | n.d. |
| Hsp105          | NC   | NC   | ↓2.1 | ↑1.7 |
| Gsta2           | NC   | NC   | ↓2.1 | NC   |
| AI553401        | NC   | NC   | ↓2.1 | ↑1.2 |
| Ephx1           | ↓1.9 | NC   | ↓2.0 | NC   |
| Gnao            | n.d. | n.d. | ↓2.0 | n.d. |
| Abcg2           | ↓1.5 | NC   | ↓2.0 | NC   |

---
